# Supplementary material for: Deep-ultraviolet transparent alkali metal–rare earth metal sulfate NaY(SO4)2·H2O as a nonlinear optical crystal: synthesis and characterization
Source: Royal Society of Chemistry journal article supplement (doi:10.1039/d1ce00226k), 2021-01-01
Supplement: d1ce00226k1.pdf [file d1ce00226k1.pdf]

**Deep-ultraviolet transparent alkali metal-rare earth metal  
sulfate  $\text{NaY}(\text{SO}_4)_2 \cdot \text{H}_2\text{O}$  as a nonlinear optical crystal: synthesis  
and characterization**

Chao Wu, Lin Lin, Tianhui Wu, Zhipeng Huang, Chi Zhang\*

China-Australia Joint Research Center for Functional Molecular Materials, School of Chemical  
Science and Engineering, Tongji University, Shanghai 200092, P. R. China

## CONTENTS

Table S1. Selected bond distances ( $\text{\AA}$ ) and angles (deg) for  $\text{NaY}(\text{SO}_4)_2 \cdot \text{H}_2\text{O}$ .

Table S2. Atomic coordinates, and equivalent isotropic displacement parameters of  $\text{NaY}(\text{SO}_4)_2 \cdot \text{H}_2\text{O}$ .

Table S3. Hydrogen-bonding interactions for  $\text{NaY}(\text{SO}_4)_2 \cdot \text{H}_2\text{O}$ .

Figure S1. IR spectrum of  $\text{NaY}(\text{SO}_4)_2 \cdot \text{H}_2\text{O}$ .

**Table S1.** Selected bond distances (Å) and angles (deg) for NaY(SO<sub>4</sub>)<sub>2</sub>·H<sub>2</sub>O.<sup>a</sup>

|                |           |                |          |
|----------------|-----------|----------------|----------|
| Y(1)-O(2)#1    | 2.355(5)  | Y(1)-O(2)#2    | 2.355(5) |
| Y(1)-O(1W)     | 2.386(11) | Y(1)-O(4)#3    | 2.393(6) |
| Y(1)-O(4)#4    | 2.393(6)  | Y(1)-O(1)#5    | 2.441(5) |
| Y(1)-O(1)      | 2.441(5)  | Y(1)-O(3)#5    | 2.474(5) |
| Y(1)-O(3)      | 2.474(5)  | S(1)-O(4)      | 1.461(5) |
| S(1)-O(2)      | 1.471(5)  | S(1)-O(3)      | 1.473(5) |
| S(1)-O(1)      | 1.482(5)  | Na(1)-O(3)#9   | 2.356(6) |
| Na(1)-O(3)     | 2.356(6)  | Na(1)-O(1)#10  | 2.415(6) |
| Na(1)-O(1)#4   | 2.415(6)  | Na(1)-O(4)#11  | 2.533(5) |
| Na(1)-O(4)#2   | 2.533(5)  | Na(1)-O(2)#2   | 2.888(5) |
| Na(1)-O(2)#11  | 2.888(5)  |                |          |
| O(4)-S(1)-O(2) | 107.8(3)  | O(4)-S(1)-O(3) | 112.0(3) |
| O(2)-S(1)-O(3) | 111.4(3)  | O(4)-S(1)-O(1) | 111.1(3) |
| O(2)-S(1)-O(1) | 109.7(3)  | O(3)-S(1)-O(1) | 104.8(3) |

<sup>a</sup>Symmetry codes: #1 y, x-1, -z; #2 -x+y+1, -x+1, z-1/3; #3 -x+y+1, -x, z-1/3; #4 y+1, x, -z; #5 x-y, -y, -z-1/3; #6 -y+1, x-y, z+1/3; #7 x, y-1, z; #8 -y, x-y-1, z+1/3; #9 y, x, -z; #10 x, y+1, z; #11 -x+1, -x+y+1, -z+1/3.

**Table S2.** Atomic coordinates ( $\times 10^4$ ), equivalent isotropic displacement parameters ( $\text{\AA}^2 \times 10^3$ ) of  $\text{NaY}(\text{SO}_4)_2 \cdot \text{H}_2\text{O}$ .  $U(\text{eq})$  is defined as one third of the trace of the orthogonalized  $U_{ij}$  tensor.

| Atom  | Wyck. | x        | y         | z       | $U_{\text{eq}}(\text{\AA}^2)$ |
|-------|-------|----------|-----------|---------|-------------------------------|
| Y(1)  | 6c    | 5631(1)  | 0         | -1667   | 8(1)                          |
| S(1)  | 6c    | 5573(3)  | 139(3)    | 741(1)  | 8(1)                          |
| Na(1) | 3a    | 4716(6)  | 4716(6)   | 0       | 17(1)                         |
| O(1)  | 6c    | 6164(8)  | -1250(9)  | 56(4)   | 14(1)                         |
| O(2)  | 6c    | 7573(8)  | 1742(9)   | 1350(4) | 14(1)                         |
| O(3)  | 6c    | 4848(10) | 1328(9)   | 9(3)    | 14(1)                         |
| O(4)  | 6c    | 3790(9)  | -1277(10) | 1486(4) | 15(1)                         |
| O(1W) | 6c    | 9131(16) | 0         | -1667   | 39(3)                         |

**Table S3.** Hydrogen-bonding interactions for NaY(SO<sub>4</sub>)<sub>2</sub>·H<sub>2</sub>O.

| D-H...A     | <i>d</i> (D-H) | <i>d</i> (H...A) | <i>d</i> (D...A) | ∠(DHA) |
|-------------|----------------|------------------|------------------|--------|
| O1W-H1...O1 | 0.7600         | 2.4700           | 3.2274           | 173.00 |
| O1W-H1...O2 | 0.7600         | 2.4800           | 3.0032           | 128.00 |

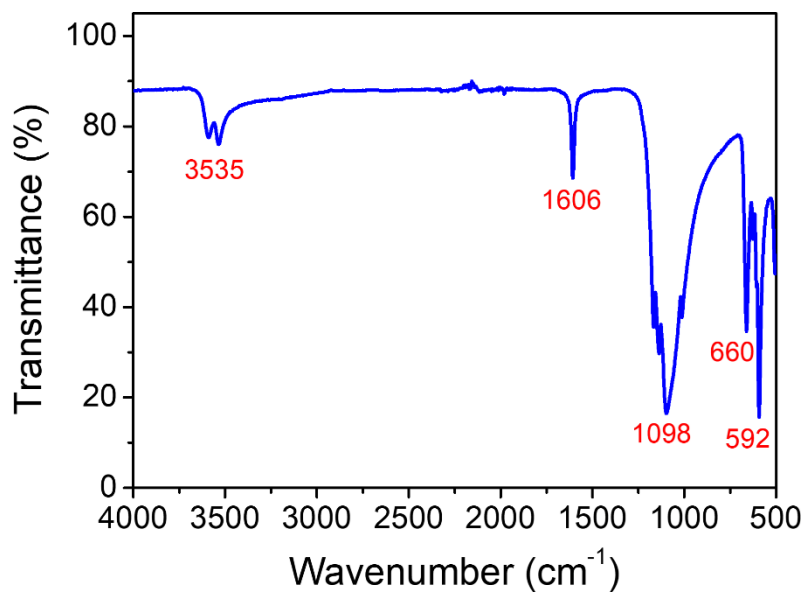

**Figure S1.** IR spectrum of NaY(SO<sub>4</sub>)<sub>2</sub>·H<sub>2</sub>O.
